# Supplementary material for: Novel magnetic multicore nanoparticles designed for MPI and other biomedical applications: From synthesis to first in vivo studies
Source: PubMed Central journal article supplement (PMC5754082; doi:10.1371/journal.pone.0190214), 2018-01-04
Supplement: pone.0190214.s002.pdf [file pone.0190214.s002.pdf]

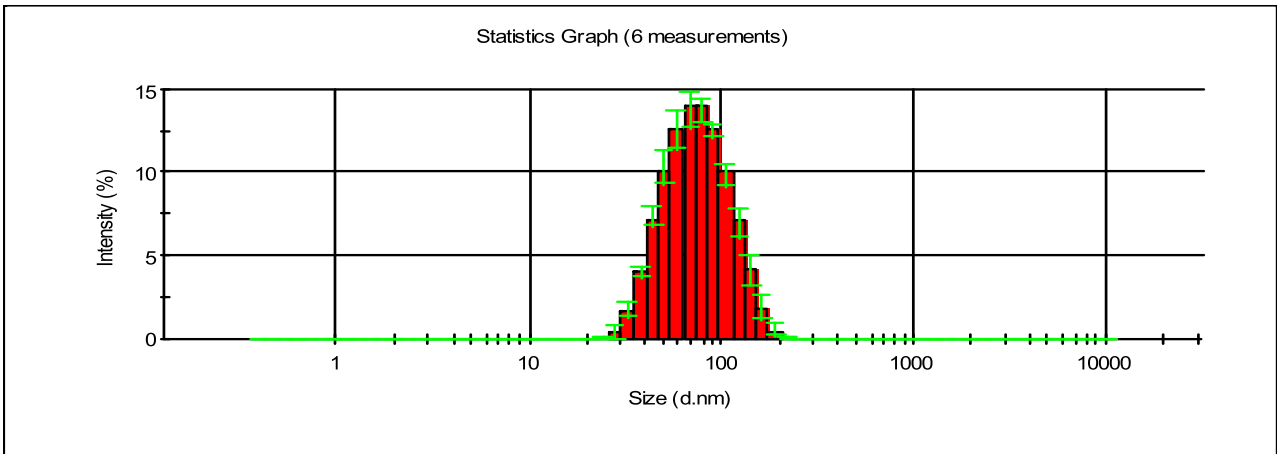

DLS size distribution (intensity) of MCP 1

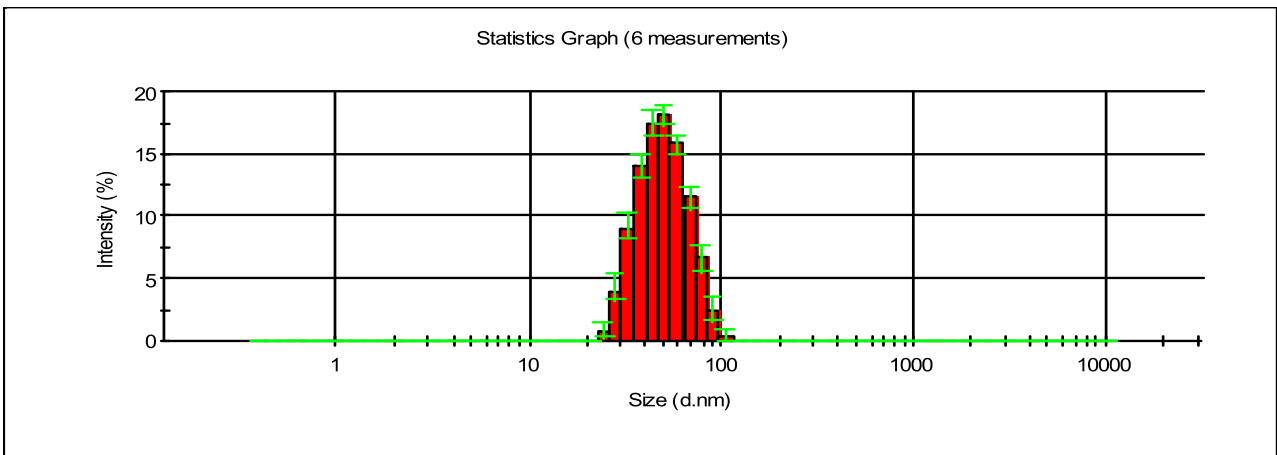

DLS size distribution (intensity) of MCP 2-1

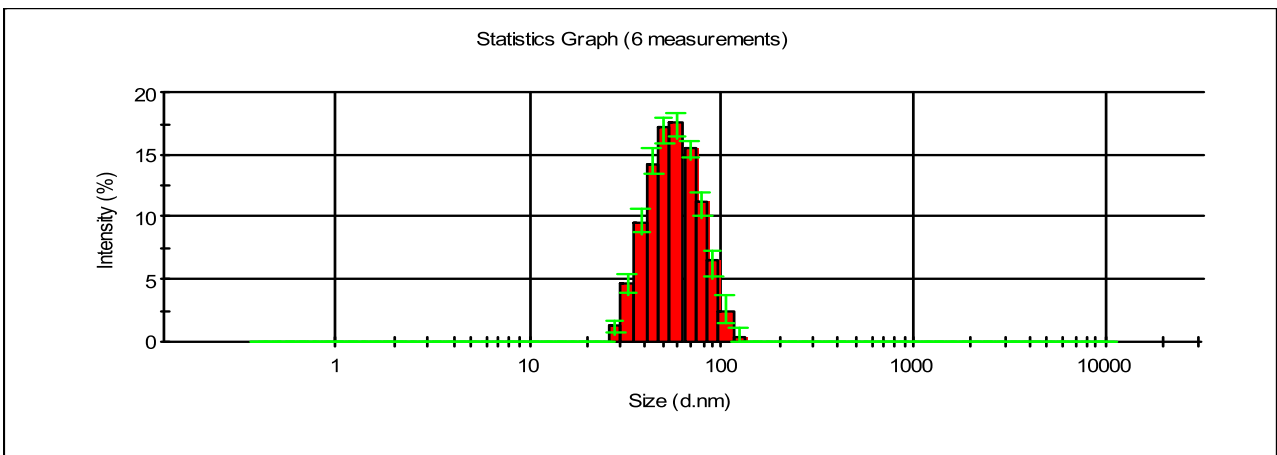

DLS size distribution (intensity) of MCP 2-2
