# Supplementary material for: Novel magnetic multicore nanoparticles designed for MPI and other biomedical applications: From synthesis to first in vivo studies
Source: PubMed Central journal article supplement (PMC5754082; doi:10.1371/journal.pone.0190214), 2018-01-04
Supplement: pone.0190214.s003.pdf [file pone.0190214.s003.pdf]

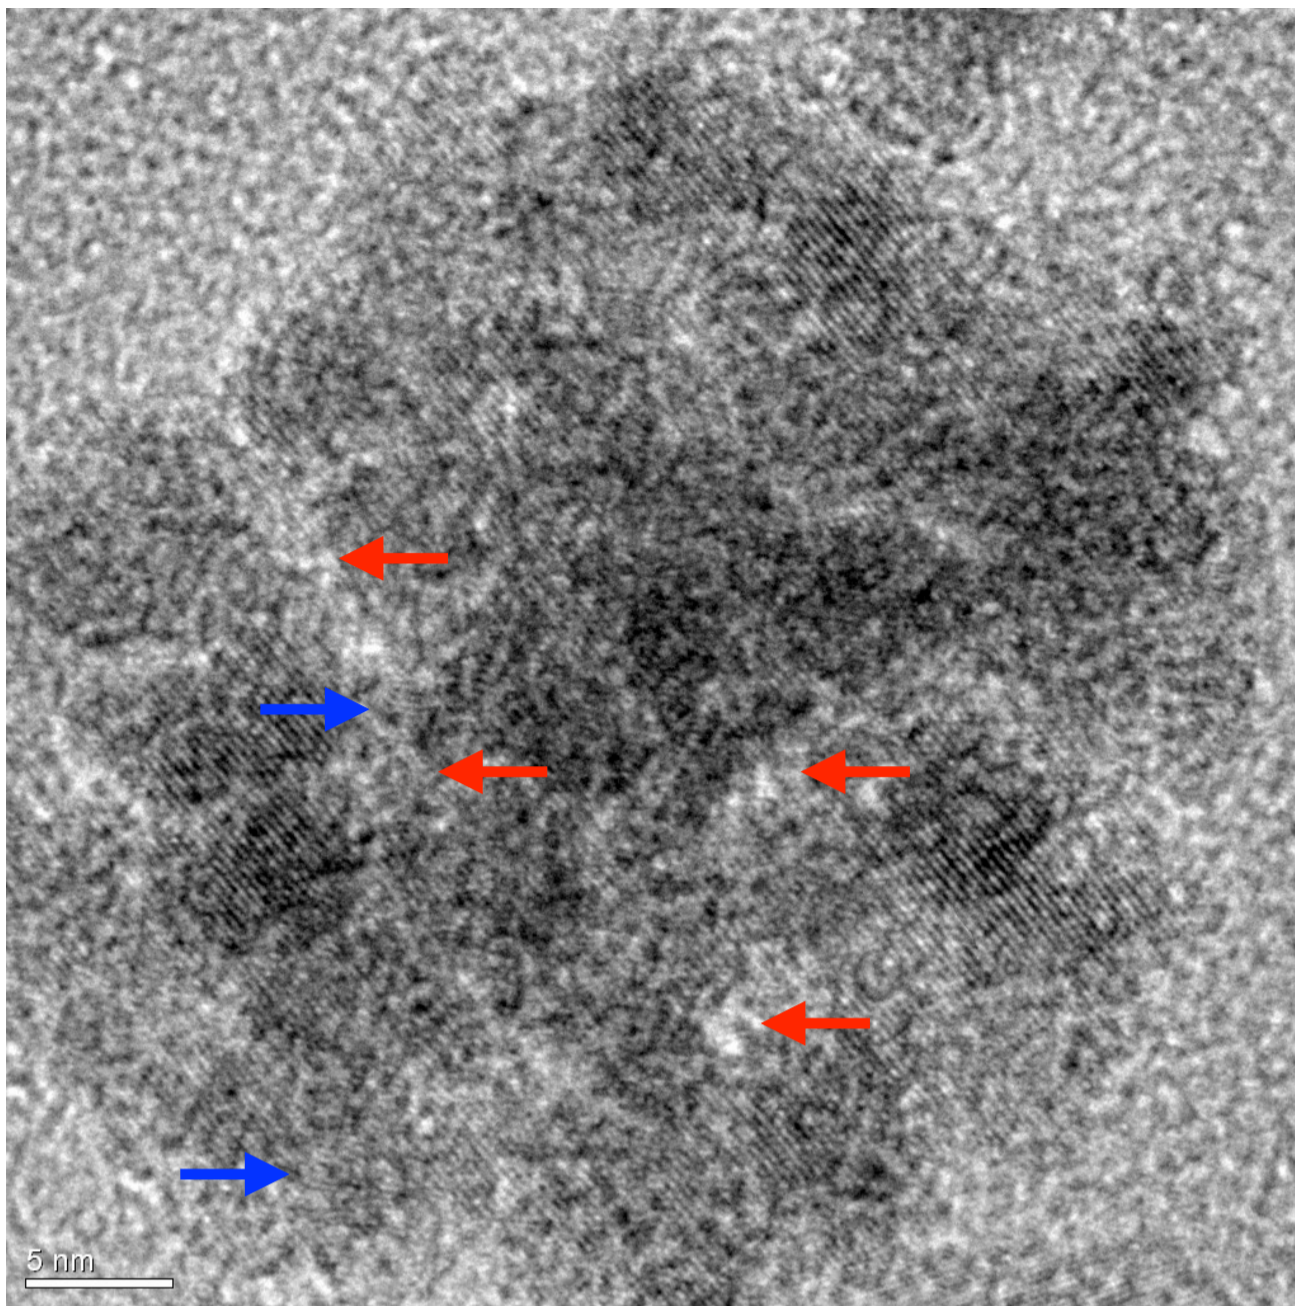

MCP 1

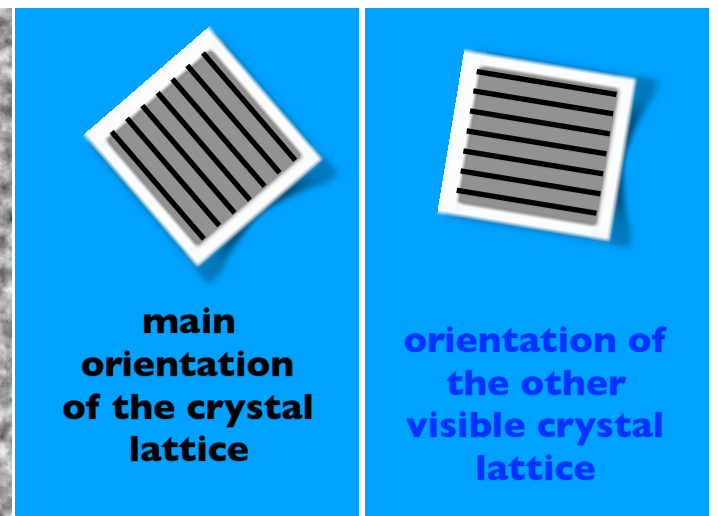

**red arrows:** examples for areas with low density within one multicore particle

**blue arrows:** examples for areas with another orientation of the crystal lattice beside the main orientation

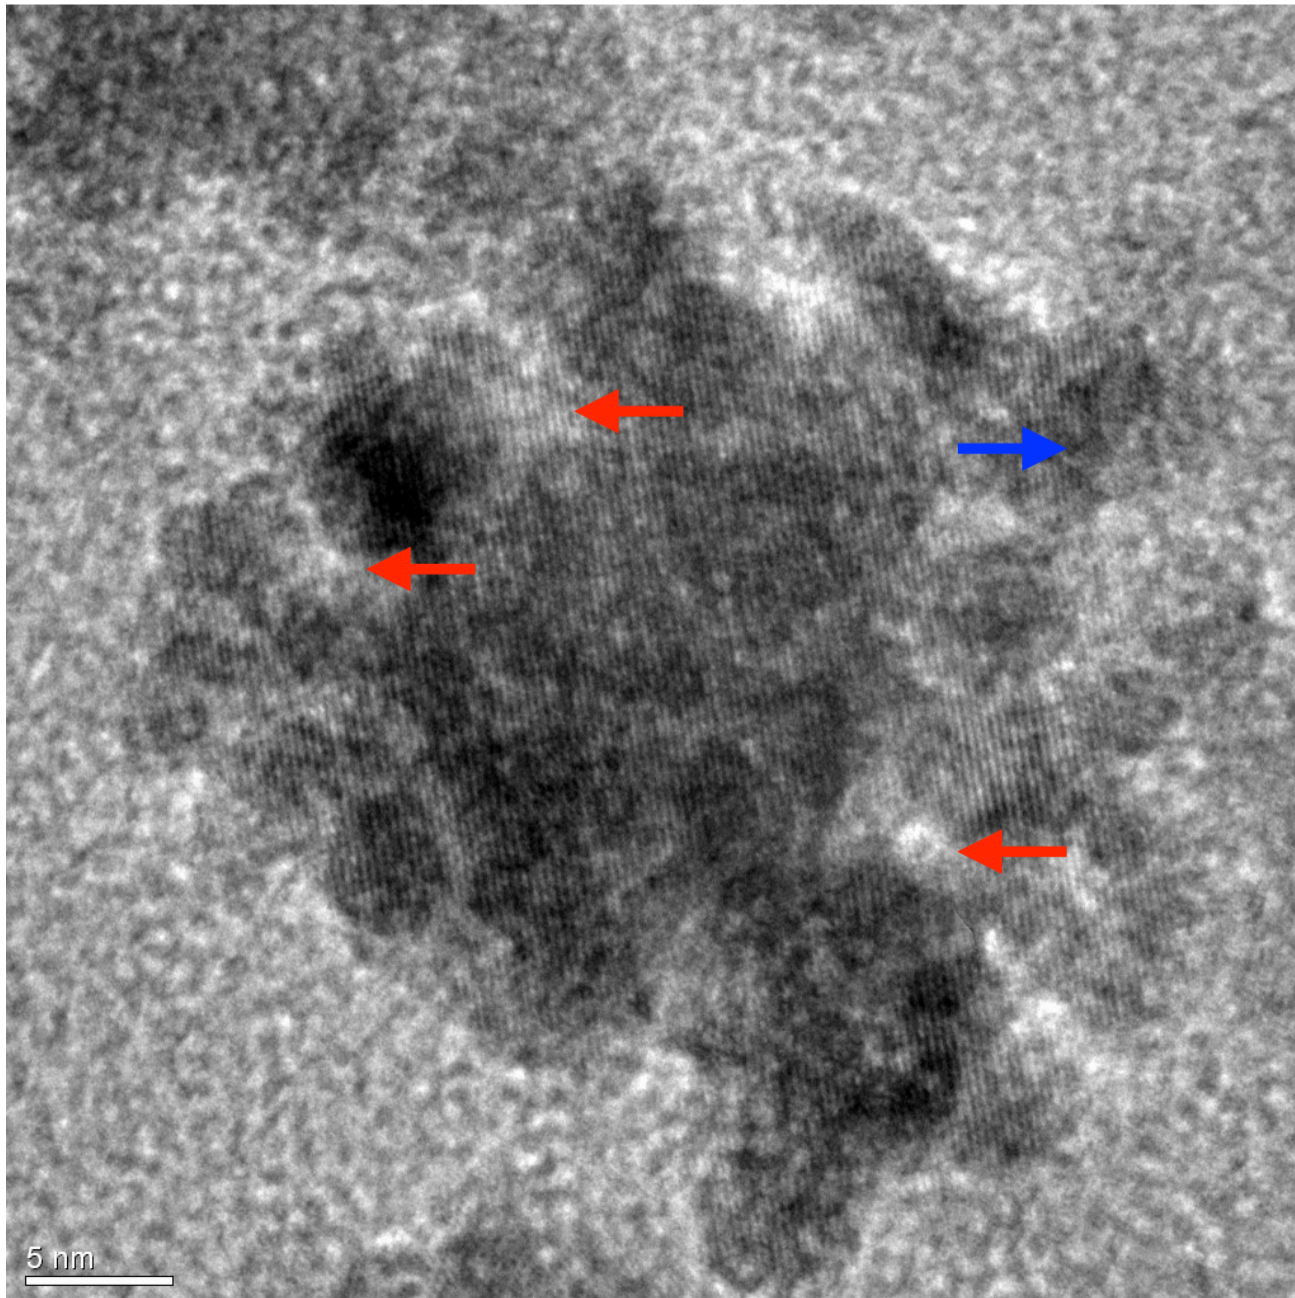

MCP 1

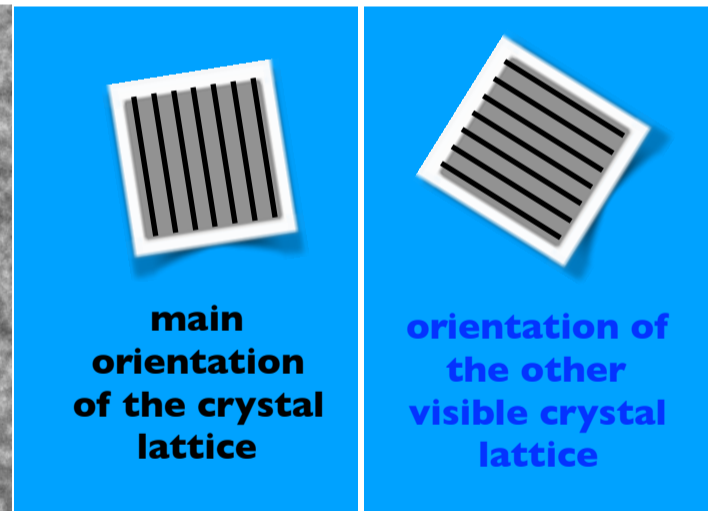

**red arrows:** examples for areas with low density within one multicore particle

**blue arrow:** example for area with another orientation of the crystal lattice beside the main orientation

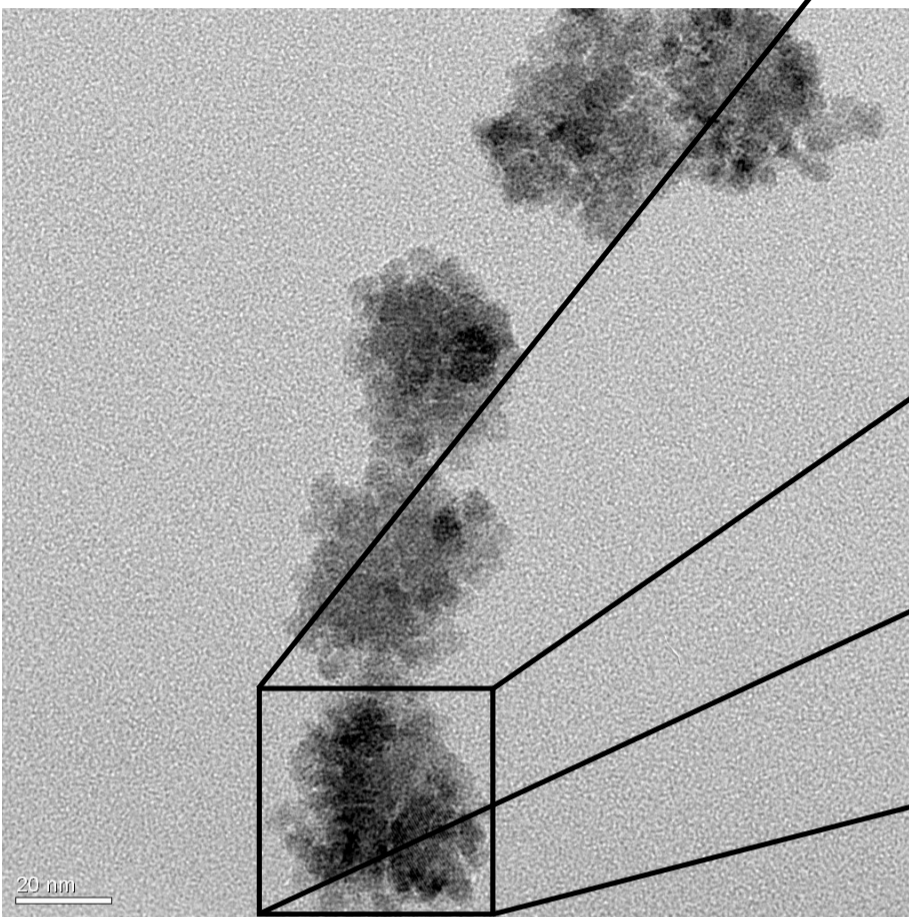

MCP 2

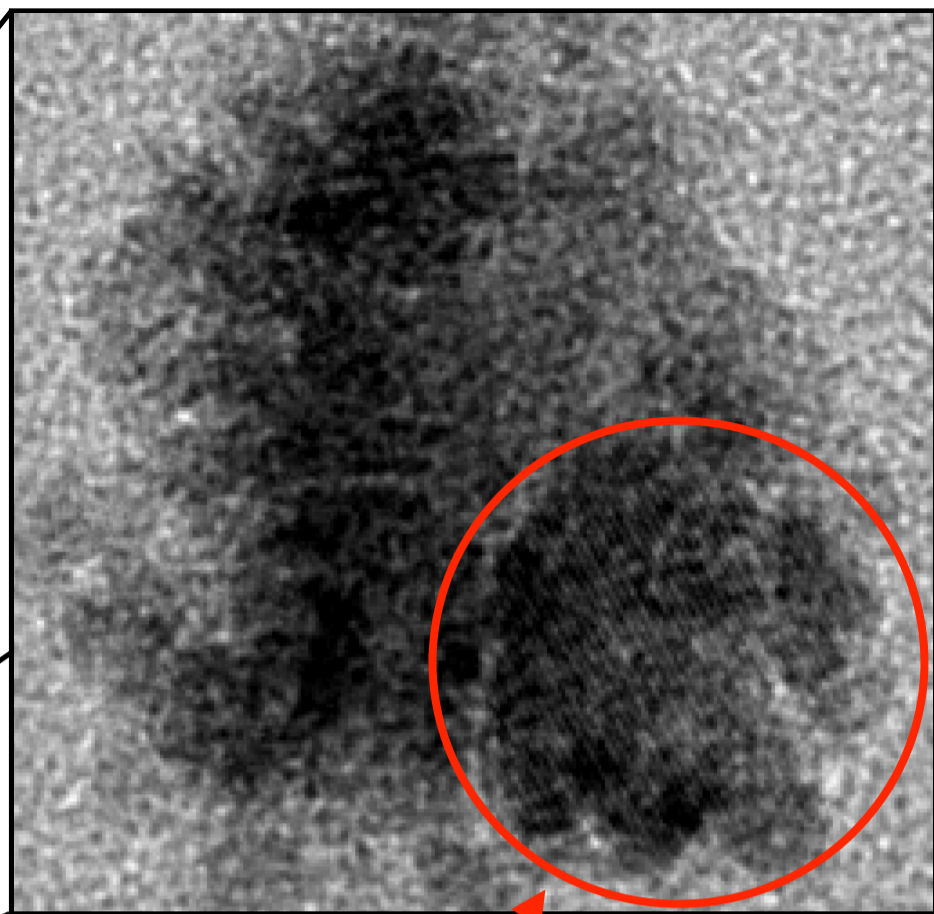

**area with continuous crystal lattice  
visible in a part of one multicore particle**
