# Supplementary material for: Novel magnetic multicore nanoparticles designed for MPI and other biomedical applications: From synthesis to first in vivo studies
Source: PubMed Central journal article supplement (PMC5754082; doi:10.1371/journal.pone.0190214), 2018-01-04
Supplement: pone.0190214.s009.pdf [file pone.0190214.s009.pdf]

A

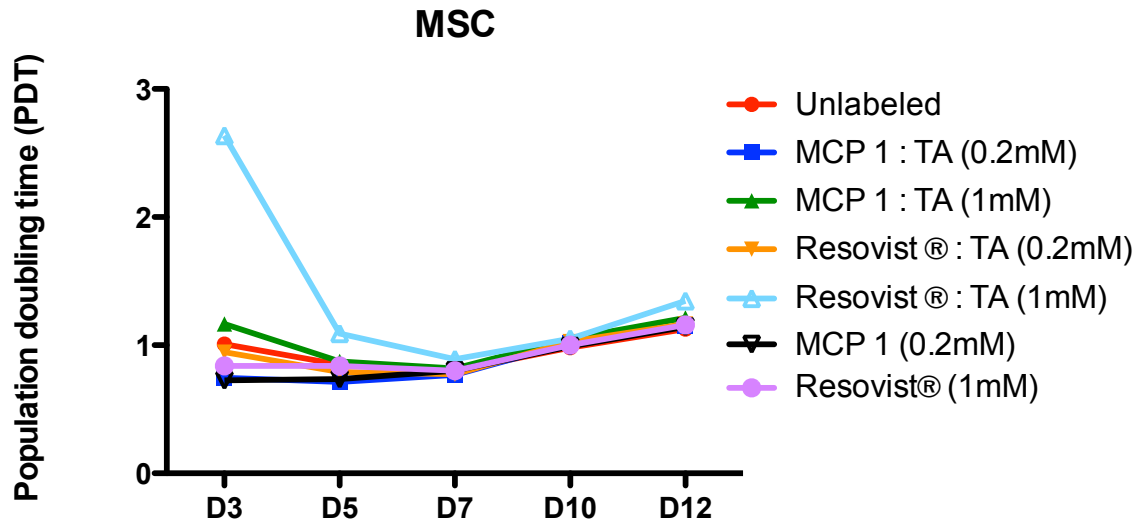

B

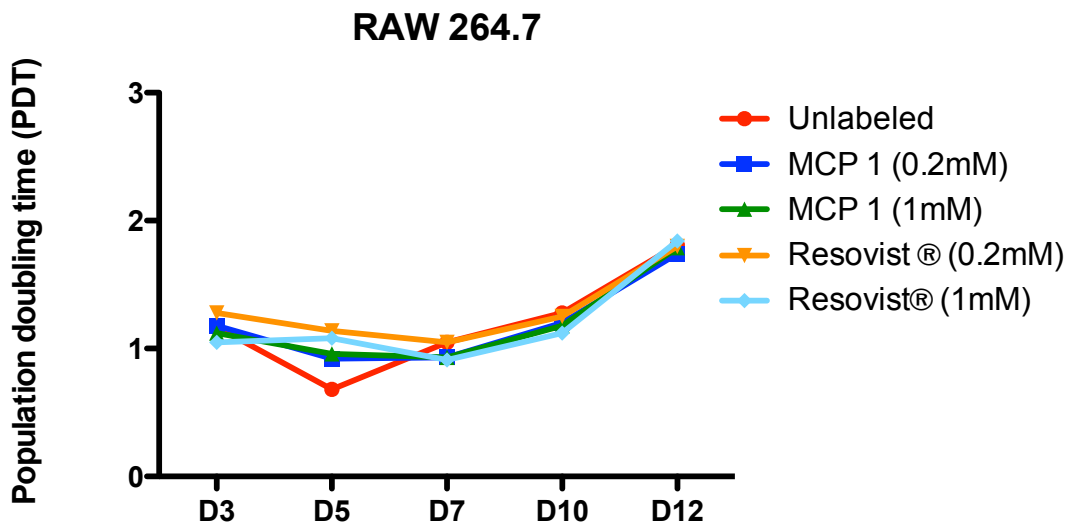

**Population doubling time (PDT):** A) MSC and B) Macrophages labeled with MCP 1 maintained similar PDT in comparison with Resovist® labeled and unlabeled cells during 12 days. PDT ( $PDT = T \times \ln 2 / \ln (A/A_0)$ ): T= time between cell counts, A= final cell number , A0= initial cell number).
